# Supplementary material
Source: PubMed Central journal article supplement (PMC3466672)
Supplement: supp_WNL.0b013e31823efc93_robertson_78_114.pdf [file supp_WNL.0b013e31823efc93_robertson_78_114.pdf]

# 척수 경색 후 회복

115명의 환자의 장기 예후

Recovery after spinal cord infarcts

Long-term outcome in 115 patients

Carrie E. Robertson, MD  
Robert D. Brown, Jr., MD  
Eelco F.M. Wijdicks, MD  
Alejandro A. Rabinstein, MD

**목적:** 척수 경색(spinal cord infarct, SCI) 환자의 장기 예후와 예후의 예측인자에 대해 파악하고자 하였다.

**방법:** 1990년부터 2007년에 걸쳐 115명의 SCI 환자를 치료하였다. 장애의 중증도는 American Spinal Injury Association (ASIA) scoring을 이용하여 평가하였다. 기능적 결과 변수는 보행 상태, 방광 카테터(bladder catheterization) 유치의 필요성과 통증으로 정하였다.

**결과:** 환자의 평균 나이는 64세이고 72 (62.6%)명은 남자였다. 전체의 45%에서 척수 경색이 수술 전후(69% 대 동맥 수술)에 발생하였다. 총 68%에서 1시간 이내에 증상이 최고점에 달하였다(mean=5 hours). 장애가 가장 심할 때 ASIA 등급은 A가 23%, B가 26%, C가 14% 그리고 D가 37%로 확인되었다. 전체의 93명 중 75명(81%)의 환자에서 MRI 검사상 척수 신호 이상이 관찰되었다. 증상이 가장 나쁜 시점에서는 81%의 환자가 휠체어를 필요로 하였고, 86%의 환자는 방광 카테터 유치가 필요하였으며, 32%는 통증이 동반되었다. 마지막 추적 관찰 시(mean=3 years), 23%는 사망하였다. 생존자 중에서 42%는 휠체어가 필요한 상태였고, 54%는 카테터 유치가 필요한 상태였으며, 29%는 통증이 마지막 추적 관찰 때까지 지속되었다. 퇴원 시 휠체어로 이동을 하였던 74명의 환자들은 마지막 추적 관찰 시 41%는 보행이 가능하였다. 퇴원 시 카테터를 필요로 하였던 83명의 환자는 마지막 추적 관찰 시 33%가 카테터 없이 배뇨가 가능하였다. 나이가 많으면( $p < 0.0001$ ) 증상의 최저점에서 장애의 정도가 심한 것으로 나타났고( $p = 0.02$ ), 말초혈관질환( $p = 0.003$ )은 사망의 독립적인 위험인자로 확인되었다. 증상의 저점에서 심한 장애(ASIA A/B)의 존재는 마지막 추적 관찰 때 휠체어 사용( $p < 0.0001$ )과 방광 카테터 거치( $p < 0.0001$ )의 예측인자였다.

**결론:** 척수 경색 후 점진적인 장애의 개선은 드물지 않으며, 퇴원 후에도 지속되는 것으로 여겨진다. 증상의 최저점에서 중증의 장애는 나쁜 기능적 예후의 강력한 예측인자이지만, 이런 환자들의 상당한 소수에서 의미 있는 회복이 가능하다.

Neurology® 2012;78:114-121

|                   | Nadir (n = 115), n (%) | End of hospitalization (n = 104 <sup>b</sup> ) (average = 18 d), n (%) | Intermediate follow-up (<6 mo) (n = 104 <sup>b</sup> ) (average = 3.4 mo), n (%) | Long-term follow-up (≥6 mo) (n = 71 <sup>c</sup> ) (average = 4.8 y), n (%) |
|-------------------|------------------------|------------------------------------------------------------------------|----------------------------------------------------------------------------------|-----------------------------------------------------------------------------|
| Pain              | 37 (32)                | Not recorded                                                           | 33 (31.7)                                                                        | 22 (31)                                                                     |
| Gait aid          | 11 (9.6)               | 18 (17.3)                                                              | 29 (27.9)                                                                        | 18 (25.4)                                                                   |
| Wheelchair        | 93 (80.9)              | 74 (71.2)                                                              | 53 (51) <sup>d</sup>                                                             | 25 (35.2)                                                                   |
| Catheter          | 99 (86)                | 83 (79.8)                                                              | 61 (58.6) <sup>e</sup>                                                           | 32 (45.1)                                                                   |
| Lost to follow-up | 0                      | 0                                                                      | 0                                                                                | 30                                                                          |

<sup>a</sup> Note that for the 3 patients not admitted to hospital, information was used from their outpatient visit.

<sup>b</sup> Does not include the 11 who died in the hospital.

<sup>c</sup> Does not include 14 who died prior to 6 months after onset.

<sup>d</sup> Includes one patient who was dismissed on crutches, regressed to wheelchair for several months, then improved to walking and continues to walk unaided over 10 years after dismissal.

<sup>e</sup> Includes one patient who did not require catheterization on hospital dismissal, but with multiple medical complications required a catheter at intermediate and long-term follow-up.
